# Supplementary material
Source: PubMed Central journal article supplement (PMC5054336)
Supplement: 10.1074_M115.057513_mcp.M115.057513-3.pdf [file 10.1074_M115.057513_mcp.M115.057513-3.pdf]

|                            | 1406.701 m/z<br>± 0.162 Da | 1905.992 m/z<br>± 0.162 Da | 1410.763 m/z<br>± 0.162 Da | 1877.88 m/z<br>± 0.162 Da | 1821.898 m/z<br>± 0.162 Da |
|----------------------------|----------------------------|----------------------------|----------------------------|---------------------------|----------------------------|
| 1406.701 m/z<br>± 0.162 Da | 1                          | 0.00443                    | 0.000219                   | 0.00571                   | 0.00566                    |
| 1905.992 m/z<br>± 0.162 Da | 0.00443                    | 1                          | 0.186                      | 0.144                     | 0.177                      |
| 1410.763 m/z<br>± 0.162 Da | 0.000219                   | 0.186                      | 1                          | 0.471                     | 0.527                      |
| 1877.88 m/z<br>± 0.162 Da  | 0.00571                    | 0.144                      | 0.471                      | 1                         | 0.825                      |
| 1821.898 m/z<br>± 0.162 Da | 0.00566                    | 0.177                      | 0.527                      | 0.825                     | 1                          |
