# Supplementary material
Source: PubMed Central journal article supplement (PMC5054336)
Supplement: 10.1074_M115.057513_mcp.M115.057513-5.pdf [file 10.1074_M115.057513_mcp.M115.057513-5.pdf]

**Search parameter**

Instrument type: MALDI-TOF-TOF

MS Tol.: 200 ppm

MSMS Tol.: 0.4 Da

Charge=1+

Mass value: Monoisotopic

Mascot 2.4

SwissProt: SwissProt 2014\_10

|                                                      | SwissProt | Decoy | False discovery rate |
|------------------------------------------------------|-----------|-------|----------------------|
| Peptide matches above identity threshold             | 4         | 0     | 0.00%                |
| Peptide matches above homology or identity threshold | 5         | 0     | 0.00%                |

| Protein                        | Calc. MH+ | Meas. Mr | Calc. Mr | Dev.(Da) | Score | MascotScore | Sequence                                          |
|--------------------------------|-----------|----------|----------|----------|-------|-------------|---------------------------------------------------|
| Keratin type II cytoskeletal 7 | 1406.706  | 1405.593 | 1405.699 | -0.106   | 40    | 32          | SIHFSSPVFTSR N-Term: Acetyl (Protein N-term)      |
| Keratin type II cytoskeletal 5 | 1410.722  | 1409.693 | 1409.715 | -0.022   | 41    | 28          | SFSTASAITPSVSR                                    |
| Keratin type I cytoskeletal 15 | 1821.884  | 1820.833 | 1820.877 | -0.044   | 308   | 128         | GGSLLAGGGGFGGGSLSGGGSR                            |
| Keratin type I cytoskeletal 15 | 1877.888  | 1876.843 | 1876.88  | -0.038   | 274   | 67          | TTTFLQTSSTFGGGSTR N-Term: Acetyl (Protein N-term) |
| Heat shock protein beta-1      | 1905.992  | 1904.933 | 1904.984 | -0.052   | 56    | 64          | LATQSNITIPVTFSR                                   |

Keratin type II cytoskeletal 7 (observed mass: 1406.6)

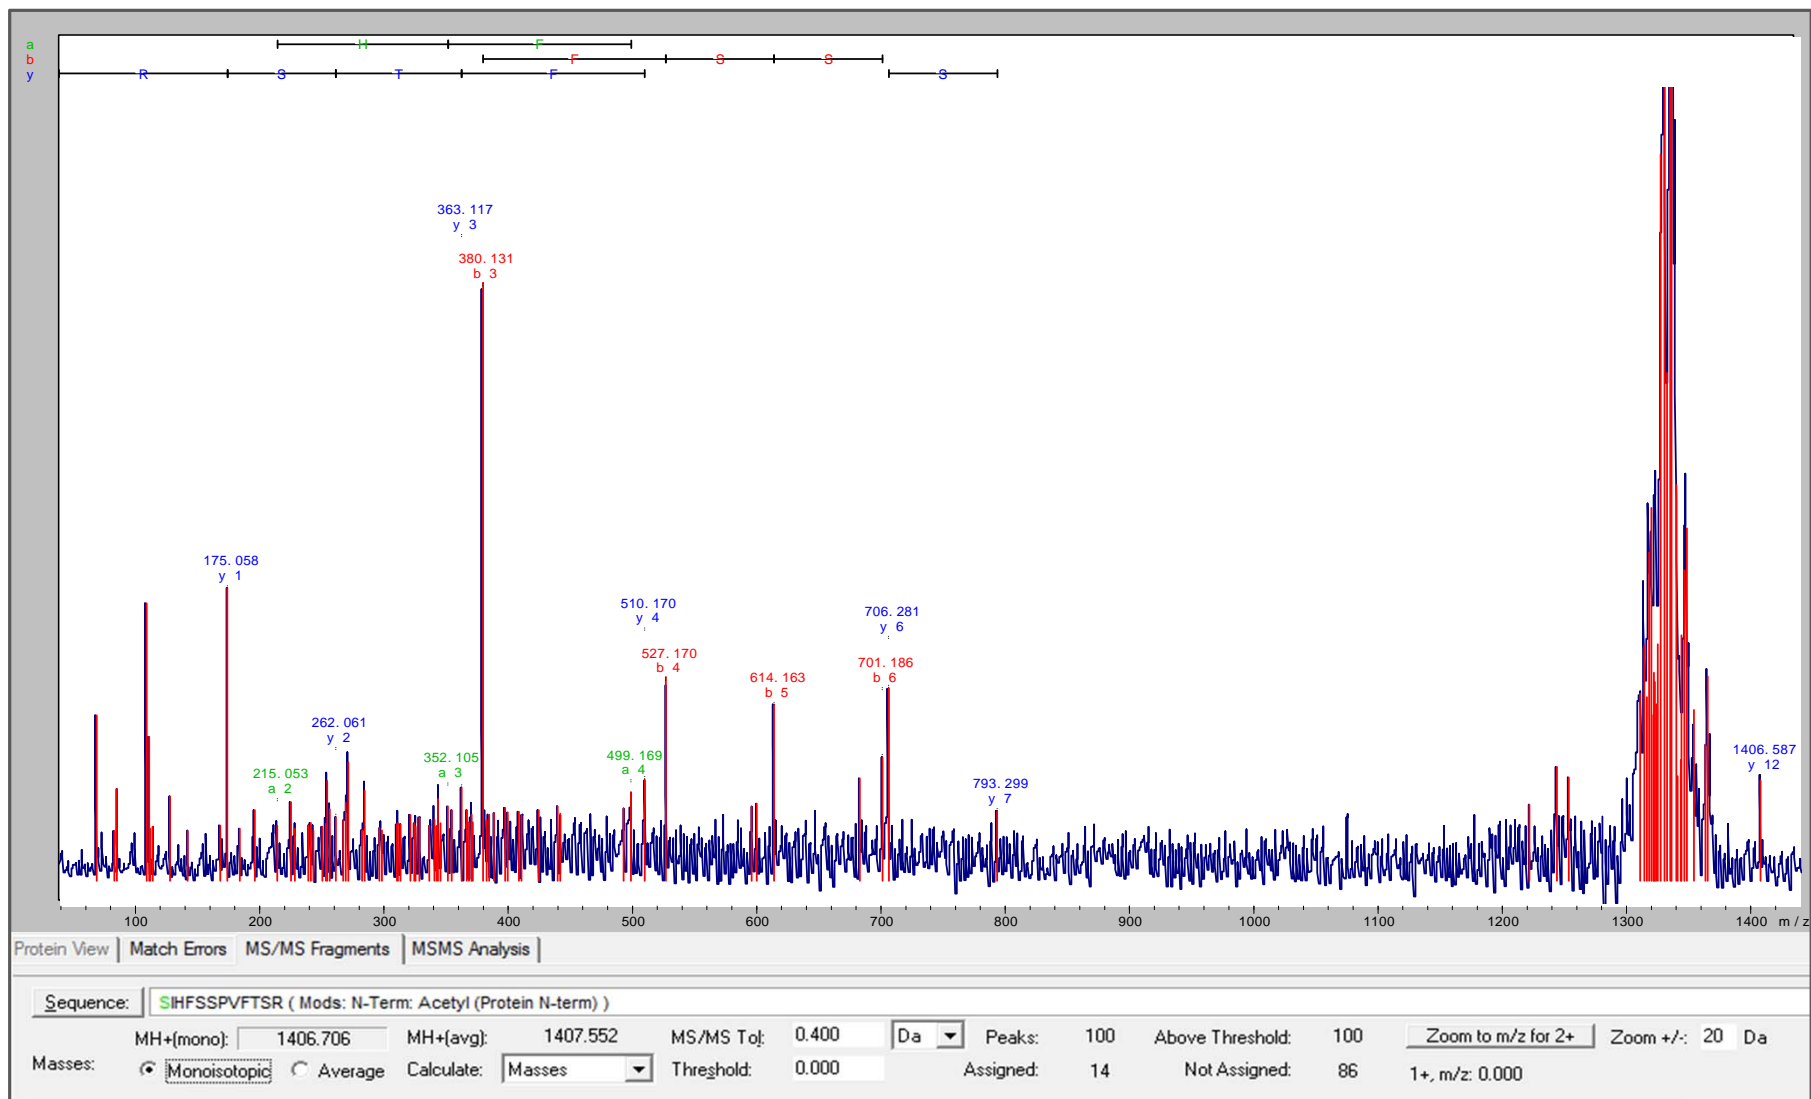

Keratin type II cytoskeletal 5 (observed mass: 1410.7)

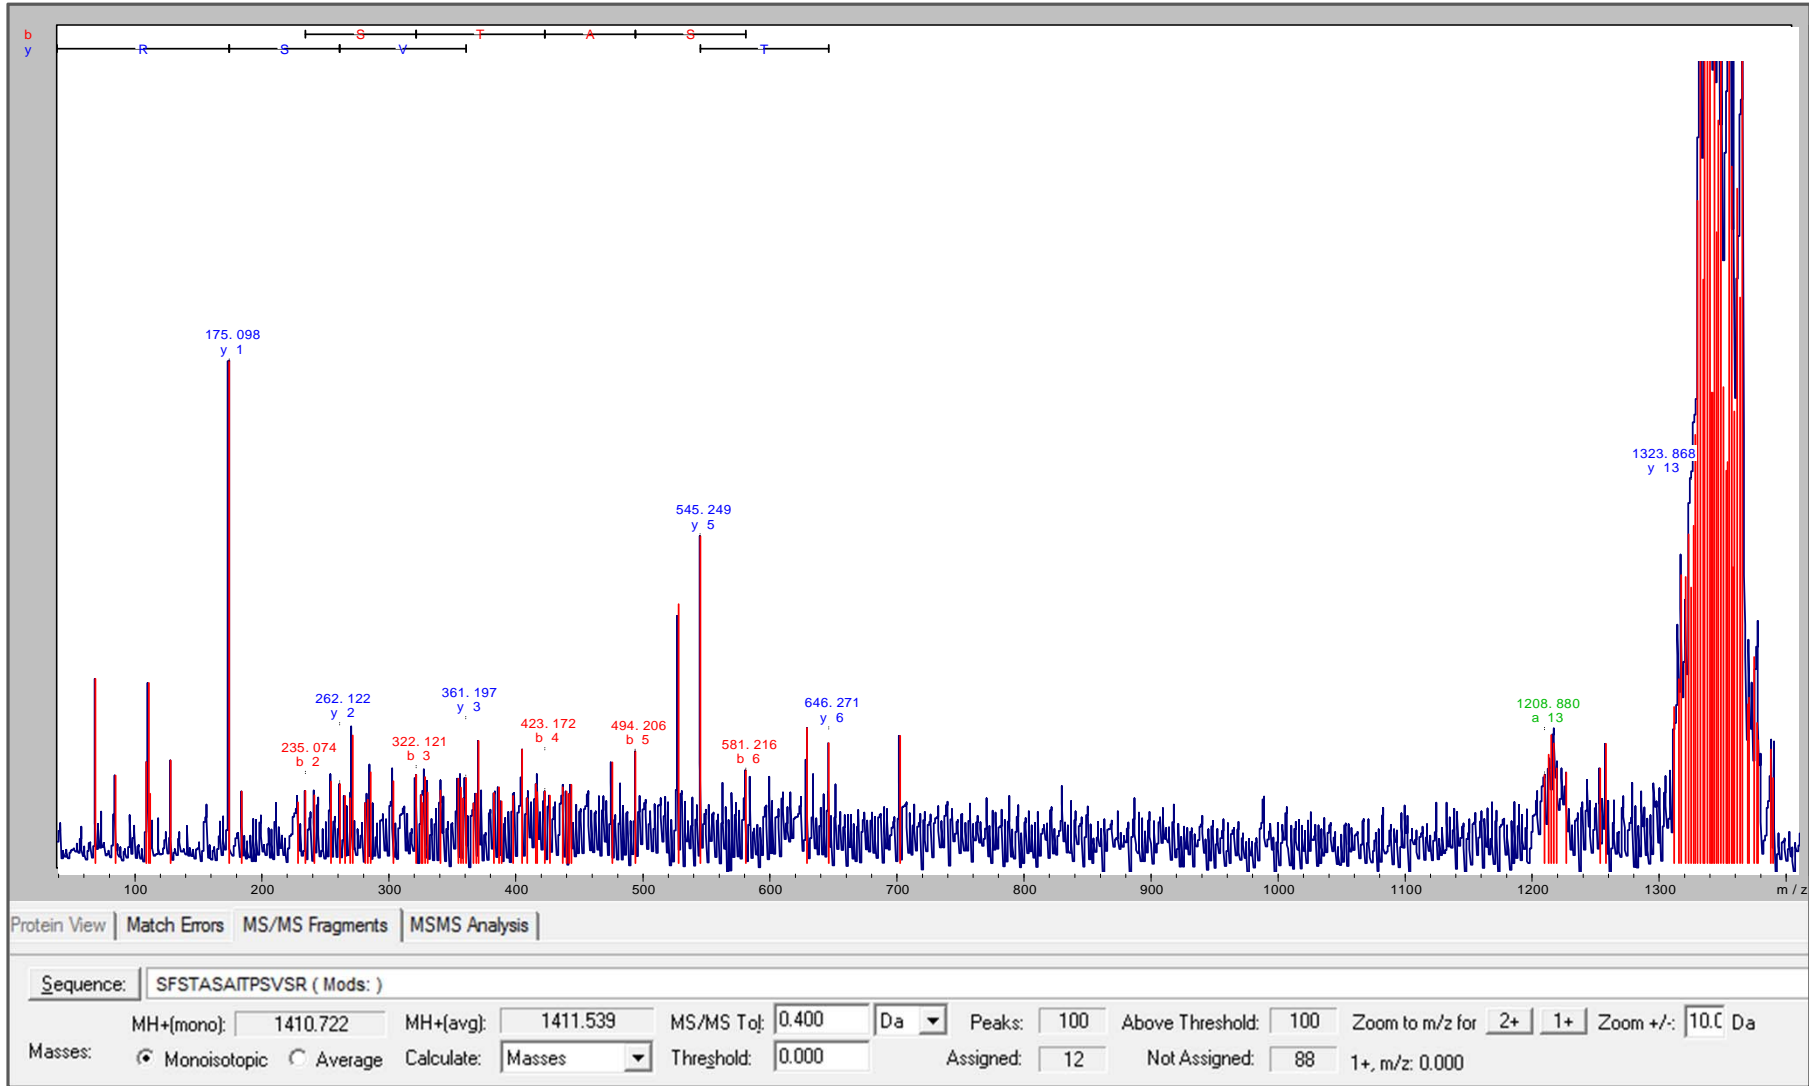

Keratin type I cytoskeletal 15 (observed mass: 1821.8)

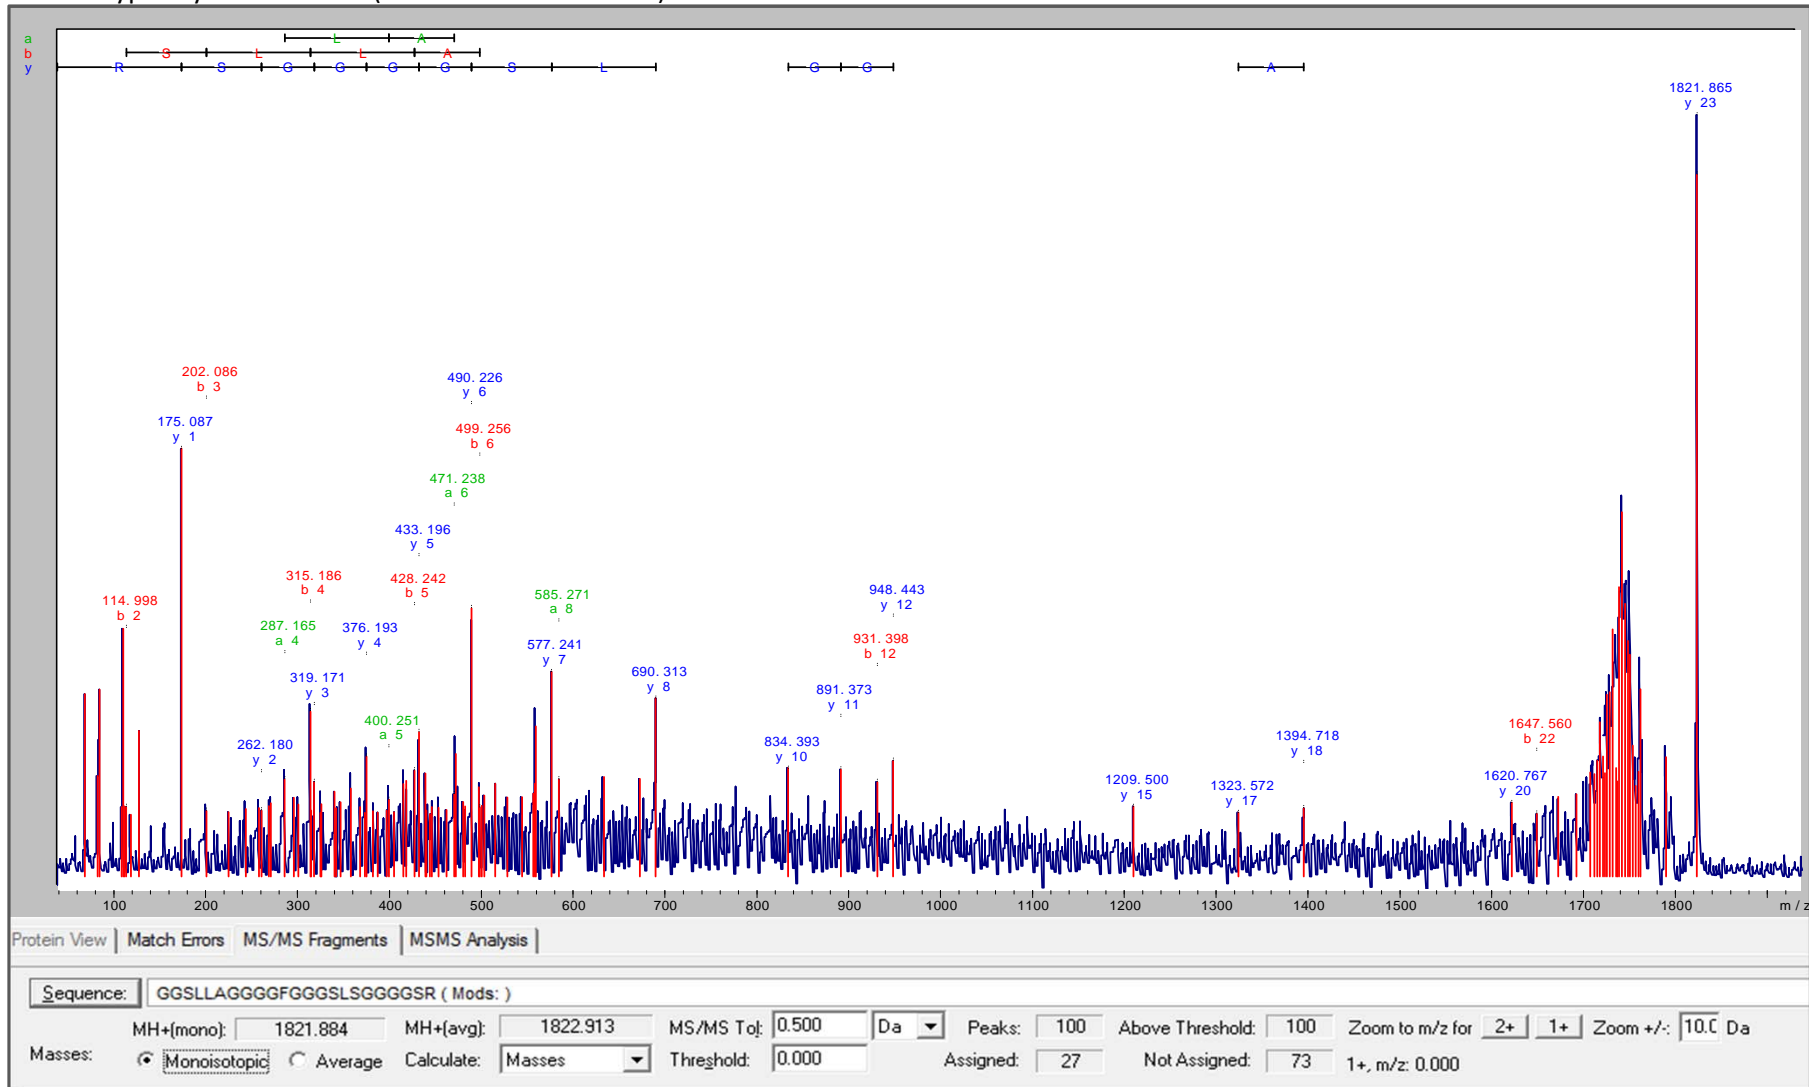

Keratin type I cytoskeletal 15 (observed mass: 1877.8)

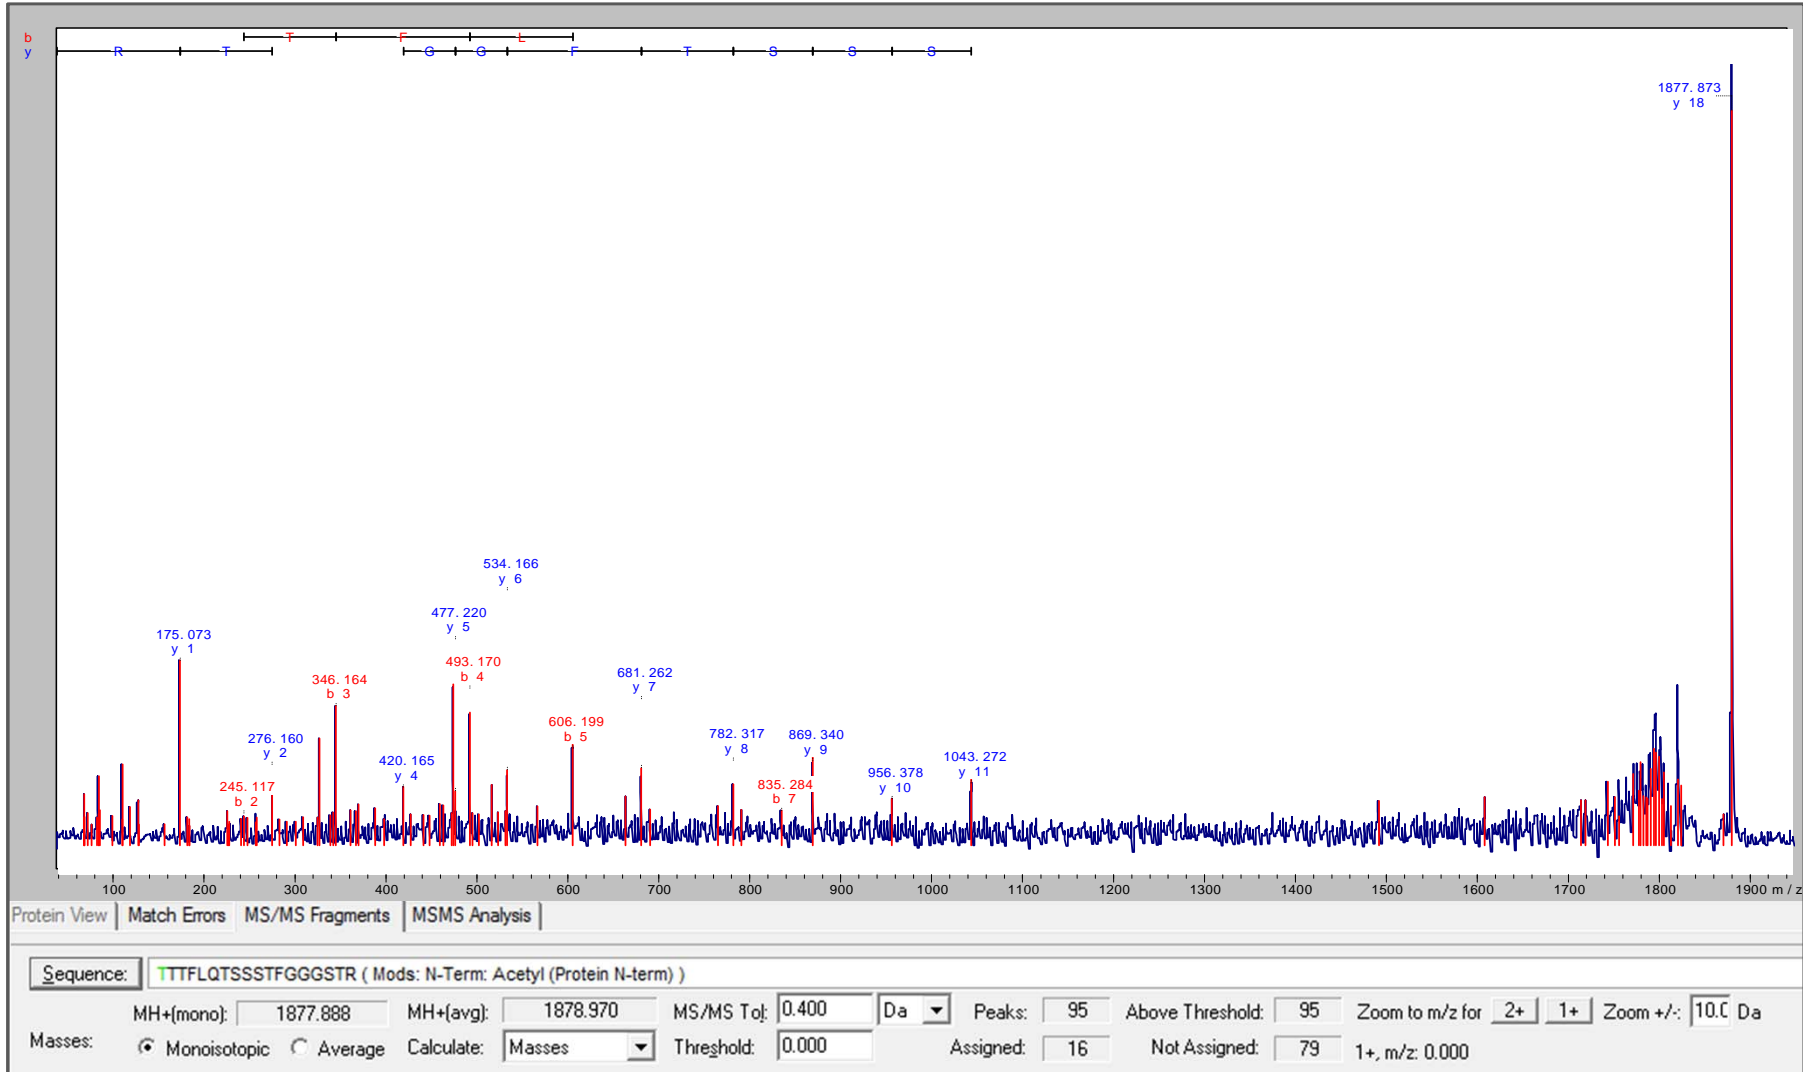

Heat shock protein beta-1 (observed mass: 1905.9)

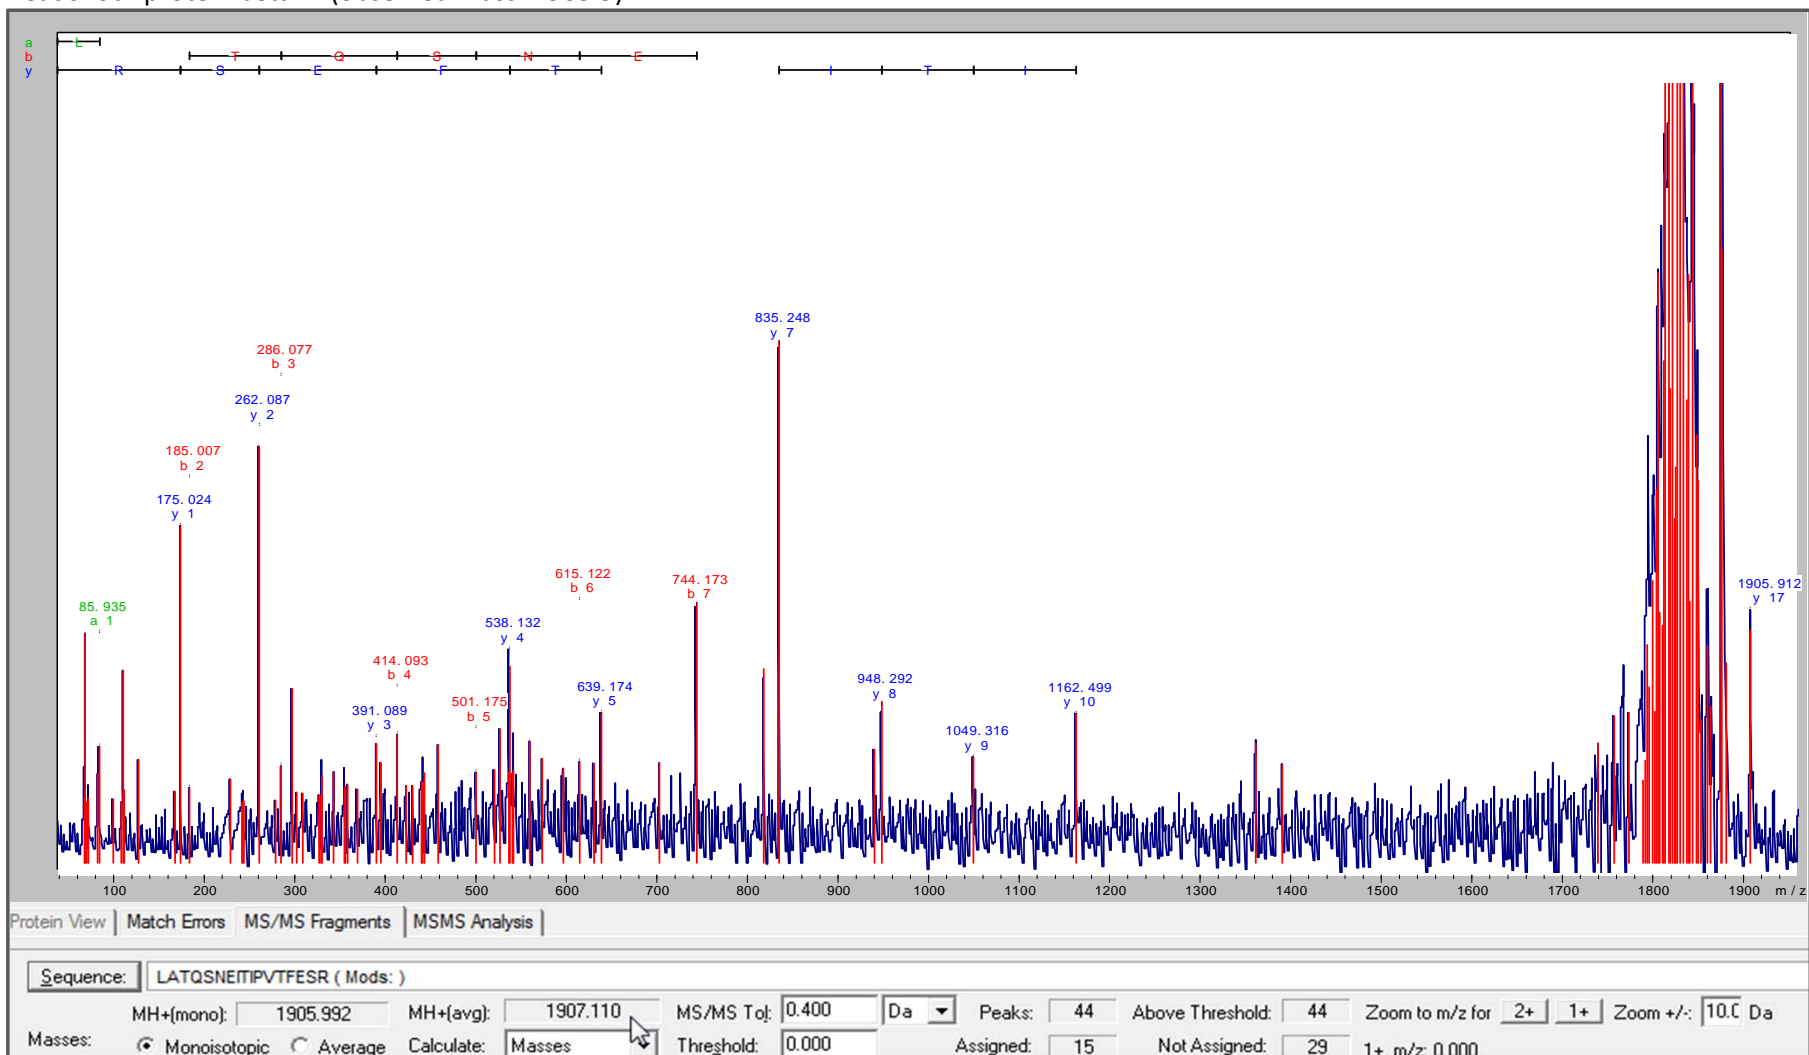

\_\_\_\_\_
