# Supplementary material
Source: PubMed Central journal article supplement (PMC5054336)
Supplement: 10.1074_M115.057513_mcp.M115.057513-6.pdf [file 10.1074_M115.057513_mcp.M115.057513-6.pdf]

| <b>Antibody</b> | <b>Pretreatment</b> | <b>Dilution</b> | <b>Clone</b>    | <b>Supplier</b>                        |
|-----------------|---------------------|-----------------|-----------------|----------------------------------------|
| CK7             | pH 6                | 1:50            | OV-TL 12/30 (1) | Dako, Hamburg, Germany                 |
| CK5/6           | pH 9                | 1:50            | D5/16B4         | Dako, Hamburg, Germany                 |
| p40             | pH 6                | 1:100           | polyclonal      | Diagnostic BioSystems, Pleasanton, USA |
| CK15            | pH 6                | 1:200           | polyclonal      | Sigma-Aldrich, St. Louis, USA          |
| HSP27           | pH 6                | 1:1000          | G3.1            | Abcam, Cambridge, UK                   |
