# Supplementary material
Source: PubMed Central journal article supplement (PMC5054336)

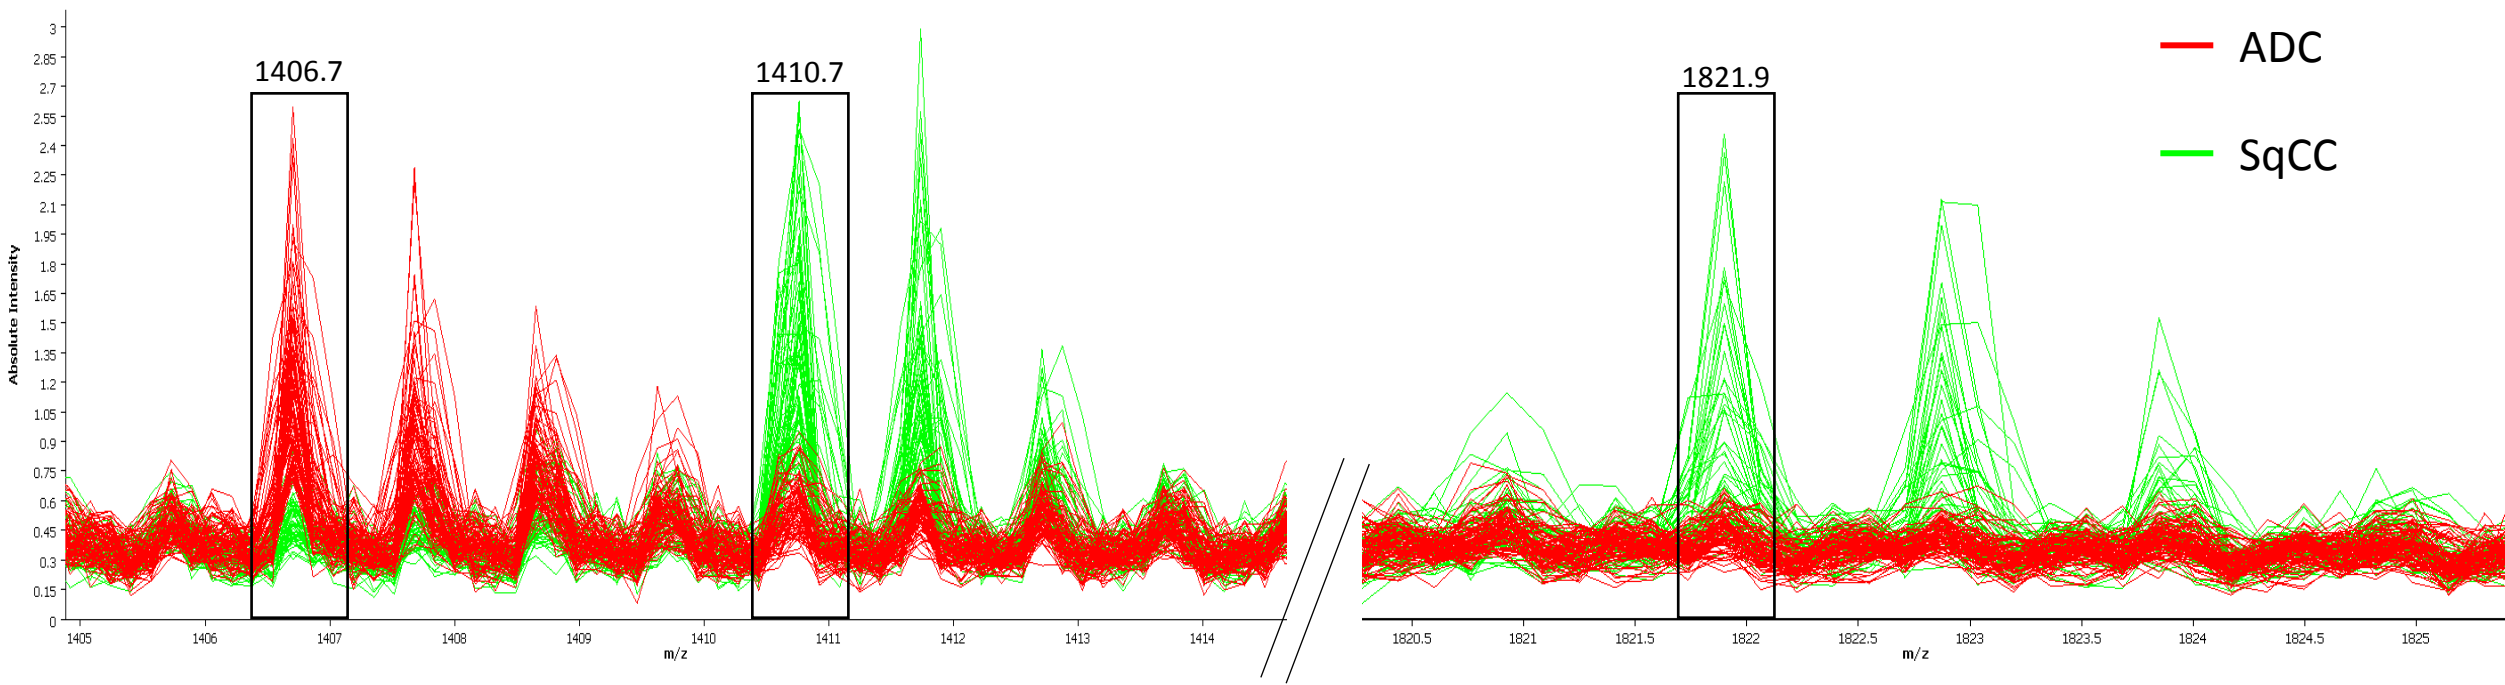

Supplement: 10.1074_M115.057513_mcp.M115.057513-1.pdf [file 10.1074_M115.057513_mcp.M115.057513-1.pdf]

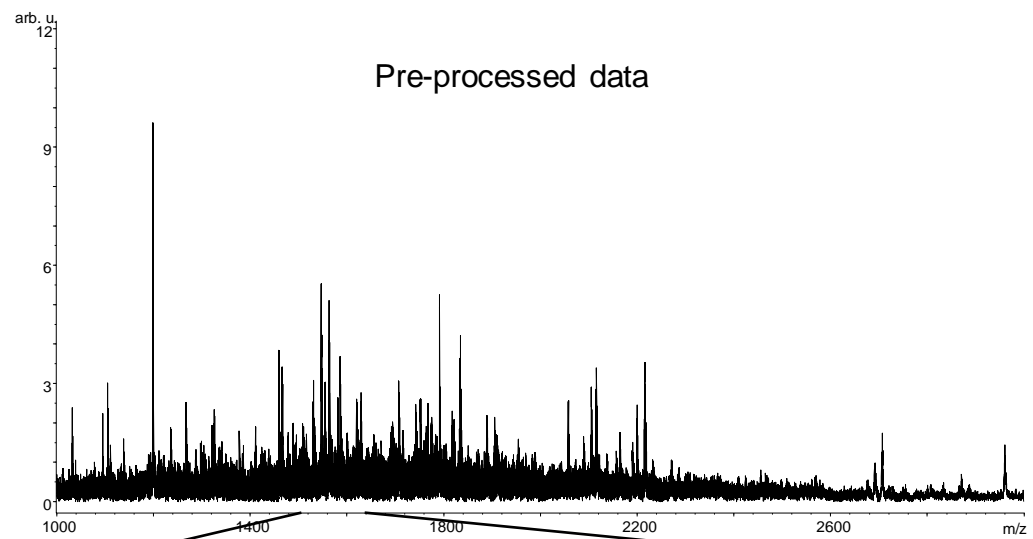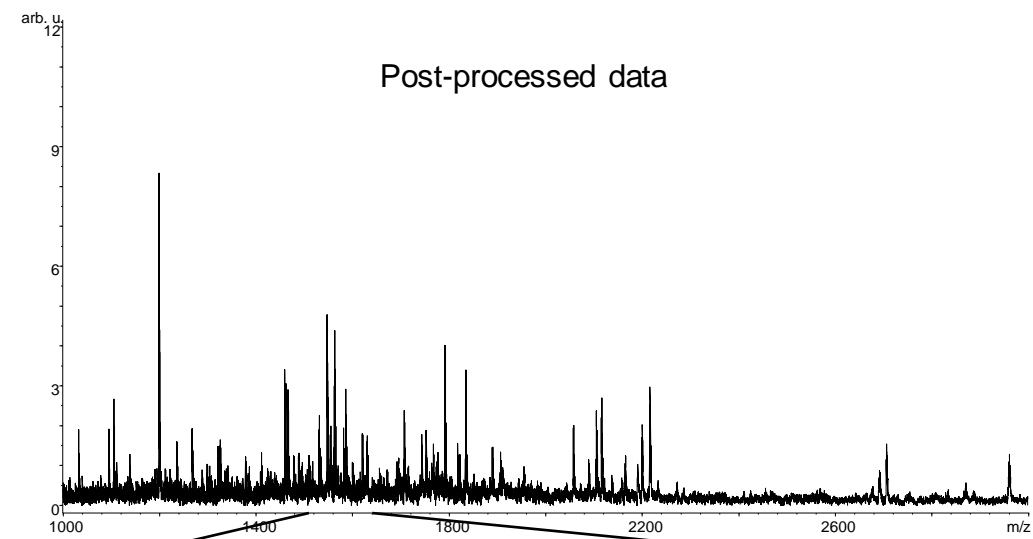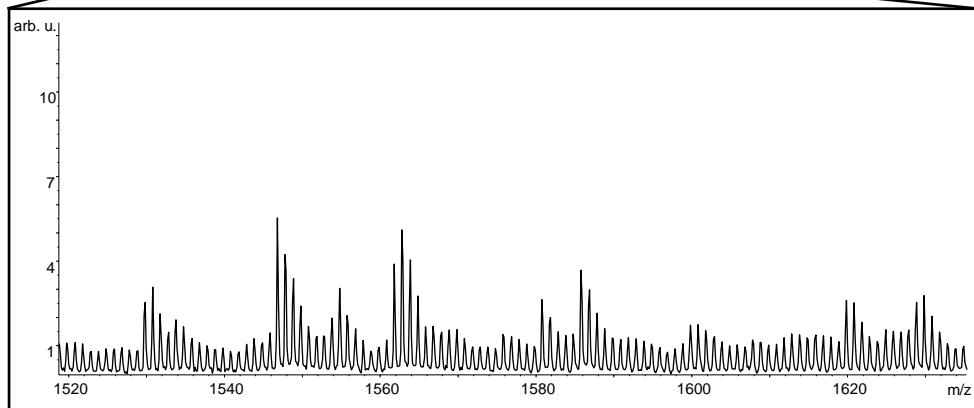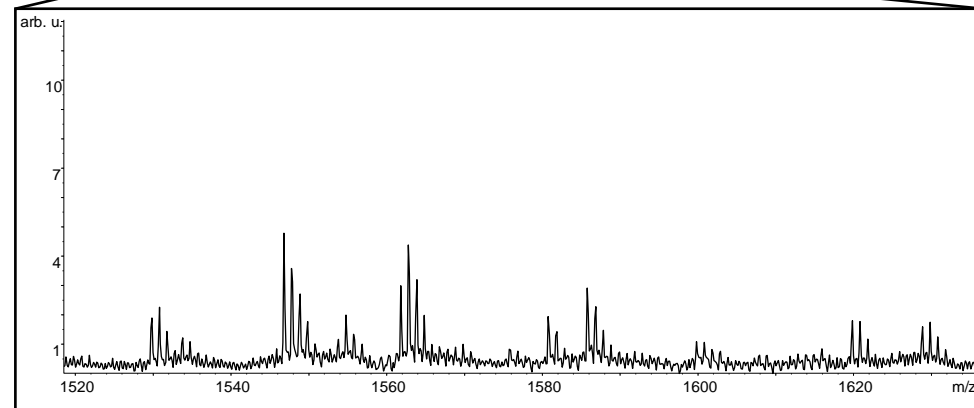

Supplement: 10.1074_M115.057513_mcp.M115.057513-2.pdf [file 10.1074_M115.057513_mcp.M115.057513-2.pdf]

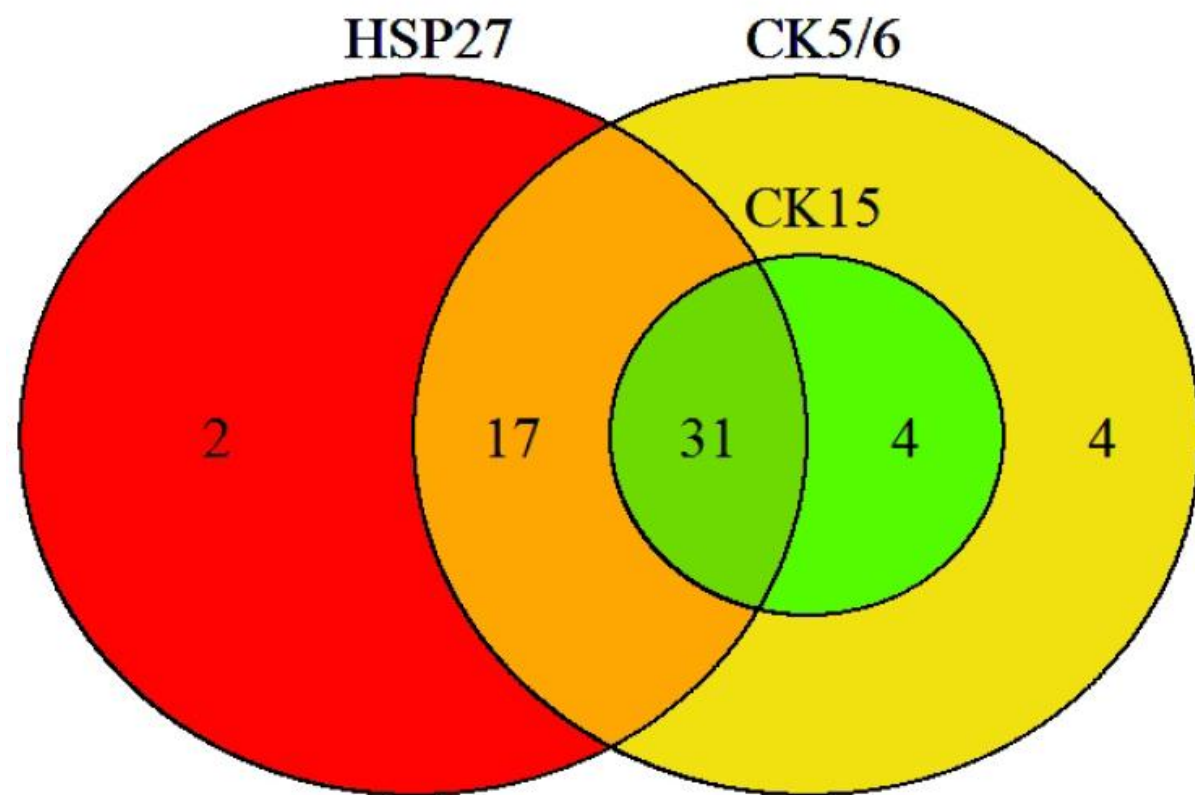

Supplement: 10.1074_M115.057513_mcp.M115.057513-4.pdf [file 10.1074_M115.057513_mcp.M115.057513-4.pdf]
